# Supplementary material for: High Molecular Weight Kininogen: A Review of the Structural Literature
Source: MDPI journal article supplement (doi:10.3390/ijms222413370), 2021-12-13
Supplement: s1 [file s1]

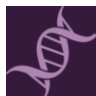

*Review*

# Supplementary materials: High Molecular Weight Kininogen: A review of the structural literature

Michał B. Ponczek <sup>1</sup>

<sup>1</sup> University of Lodz, Faculty of Biology and Environmental Protection, Department of General Biochemistry, Pomorska 141/143, 90-136 Lodz, Poland; [michal.ponczek@biol.uni.lodz.pl](mailto:michal.ponczek@biol.uni.lodz.pl)

\* Correspondence: [michal.ponczek@biol.uni.lodz.pl](mailto:michal.ponczek@biol.uni.lodz.pl); Tel.: ++48426354483

D5 domain His rich domain is important in contact activation  
D6 domain interacts with prekallikrein and Factor XI

\***Amino acid** numbering is according to human factor **HK**.

|                    |                 |             |             |            |             |            |
|--------------------|-----------------|-------------|-------------|------------|-------------|------------|
| Human              | MKLITILFL---C   | SRLLSLTQE   | -SQSEEIDCND | KDLFKAVDAA | LKKYNSQNQSN | NQFVLYRITE |
| Dog                | MKLLAMFL---C    | SRLLPSTQE   | -SLSEEIDCND | EDLFKAVDTA | LKKYNSRNQSG | NQFVLYRVTE |
| Siberian Tiger     | MKLIIVLFL---C   | SRLLPSTTEE  | -SFSQDIDCND | EDLFKAVDTA | LKKYNSRNQSG | NQFVLYRVTE |
| Grizzly Bear       | MRLALLFL---C    | SRLLPVSQE   | -SSQE-IDCDD | EDLFKAVDTA | LKKYNSRNQIG | NQFVLHRVTE |
| Hippopotamus       | MKLITILFL---C   | SRLLPSTQD   | -SLQE-IDCND | QDVFEAVDTA | LKKYNSGNKSG | NQFVLYRVTE |
| BN Dolphin         | MKLITILFL---C   | SRLLPSTQD   | -SSQE-IDCND | PDVFQAADTA | LKKYNSGNKSG | NQFVLYRVTE |
| Opossum            | MKLAVVL-L-L-V   | TSQL-NVQGE  | -S--E-VSCQD | NDVFRAMDA  | LTEYNNQKTSG | NQFVLHQIMA |
| Koala              | MELAAIL-L-L-V   | A-IQLNVQV   | -SQVKDVACDD | NDVFQAVDVA | LTKYNNQKSSG | PQFVLYRIIT |
| Wombat             | MELAVIL-L-L-V   | AS-QLNVQVE  | -SQVKDVACDD | NDVFRADVDA | LTKYNNQKSSG | PQFVLYRIIT |
| Platypus           | MKLLGVL-L-F-L   | GSSLLPSRTA  | -PVPQDVDCND | SDVFKAVDRA | LRWYNEHLKDG | NQFLLYRVTE |
| Kiwi               | MKPFLAI--VL-C   | CSFFSSRATP  | -LPFEFSDCDD | PDVLEAVDTA | LKKYNGGRTTG | NQFALYMVME |
| Pigeon             | MKPFLVL--AL-C   | CSFLSSRATP  | -LPFEFLDCDD | PDVFKAVDAA | LQEYNGDRASG | NQFALYTVVE |
| W-T Tropicbird     | MKLFIVL--AL-C   | CSFFSSRATP  | -LPFEFSDCDD | PDVFKAVDTA | LKKYNGDRGTG | NQFALYMVME |
| Alligator          | M-----L-C       | CLFKSTND    |             |            |             | DFMLL----- |
| Green Sea Turtle   | MKLSTVL--VL-C   | CSFFSSRASFP | -LPTQDADCDD | PDVFEAVDIA | LRKYNGDKTDG | NQFALYMVME |
| E Brown Snake      | MEVFI-LLLLGIGFC | QAARDKVDR   | -----ND     | PEVVDVAGA  | IAALNEDRSHG | NKLALGAILH |
| Anolis Lizard      | MELFILLVLTFC    | C----KQAVP  | -LEGEDADCDS | PDVFSAVDLA | VKAHNEDQKHG | NLFALRVILA |
| Xenopus leavis     | MKHLFSF--IFF-   | LHLL--RG-S  | ASQTIEADCND | HNIFYAVDEA | LRHHNKELIDG | NQFVLYRITE |
| Xenopus tropicalis | MQHLFTF IVF-    | LHLL--RG-S  | ATQAIEADCND | HNIFNAVDEA | LRHHNRALTDG | NKFVLYRITE |
| Nanorana parkeri   | MVV-----VVV-    | VGGDS AAVP  | V-PDIGVDCDD | PNIFKAVDEA | LRYYNDAKEDG | NQFLLFRV-- |
| Latimeria          | MKVLALV--LL-C   | TKLYVSWAK-  | -SLLQPADCGD | PRVHQAVDAA | IKKYNEELKDG | HQFALYRITK |
| Zebrafish          | MARDKILTVAL-M   | LWLIFCGGLA  | -QTDSSVPCDD | RRVEKVVNLT | LGTHNKMITEG | AQLALYEIL- |
| Pufferfish         | MRSGLGLCVLG-L   | LCLSSSVR-A  | -QEPVKVSCDD | PSVEKAVSSA | VEKFEKLTTG  | NKLALFQIQ- |
| Elephant Shark     | MKLFVVLLFSSQLLH | SNARSVSDIDS | VDPIPIDCDD  | PELKAVDFT  | LRKFNGERRTT | HQYALDRVS- |

|                    |             |                |            |            |             |             |
|--------------------|-------------|----------------|------------|------------|-------------|-------------|
| Human              | ATKT-VGSDTF | -Y-S-FKY-EIKEG | -DCPVQSGKT | WQDCDYKDAA | KAATGECTAT  | VGKRSSTKFS  |
| Dog                | GTRT-DDPDTF | -Y-S-FKY-QIREG | -NCSVQSGKT | WQDCDYKEST | QAATGECTSAT | VGKRGKTKFS  |
| Siberian Tiger     | VRTT-DDPETF | -Y-S-FKY-QIREG | -DCSVQSDKT | WQDCDYKESA | QAATGECTSAT | VGKRGNTKFS  |
| Grizzly Bear       | VVRT-DDPDTF | -Y-S-FKY-QIREG | -NCSAESGKT | WQDCDYKDAA | QAATGECTSAT | VGKRGNTKFS  |
| Hippopotamus       | VTRM-DNPDTF | -Y-S-FKY-QIKEG | GDCPVQSNKT | WQDCDYKDSA | QAATGECTAT  | VAKRGNMKFS  |
| BN Dolphin         | VIRT-DDPDTF | -Y-S-FKY-QIKEG | -NCPVQSDKT | WQDCDYNDSA | QAATGECTAT  | VAKRGNMKFS  |
| Opossum            | VSLT-ESSQRT | -F-T-VTY-NIQEG | -DCHVRMGKN | WKECGIKKDL | NKERGQCTAI  | VKSHNEFEFT  |
| Koala              | ASLT-DSSERT | -F-T-ITY-EIRES | -NCMIETGKN | WKECSYKDSA | EWKQGECTAI  | VKSQNGKEFK  |
| Wombat             | TASL-TDSNER | -T-FTITYE-IRE- | SNCMETGKN  | WKECSYKDSA | KWEQGECTAI  | LKSQNGKEFK  |
| Platypus           | ASMT-TDSDTF | -Y-S-LKYQ-IREG | -DCPVQKDKH | WQDCDYREAA | EAATGECTAT  | VKTKNKEKFT  |
| Kiwi               | GKKT-AGPDTQ | -F-Y-VKYQ-IRET | -SCAIEENKH | WKDCDYKAPA | EAKTGECTAR  | VHINKAEKTS  |
| Pigeon             | AKRT-VGPVTQ | -F-H-VKYR-IRET | -TCATEENKL | WQDCDYKASA | EAQTGE CIAQ | VHLNDAEKTS  |
| W-T Tropicbird     | AKKT-ASPDTQ | -F-Y-VKYR-IQET | -TCAIEENKL | WQDCDYKVPS | EAKTGECTAR  | VHMYNTEKTS  |
| Alligator          | FFSQ-AGPGAQ | -F-F-VKYR-IRES | -TCAIGEGKA | WQDCDYNAAV | EAETGECTAE  | VYIDKTQKIS  |
| Green Sea Turtle   | AKRI-EGSGKQ | -F-F-VMYR-IRES | -SCAVGGDKL | WQDCDYRASA | EAESGECTAQ  | VYVDKTEQIS  |
| E Brown Snake      | AYRI-ADPRKK | -FLIIYHVR--ETV | --CPIAVDKP | WQKCELLRTS | KAHSGKCTAN  | IDINESEQFT  |
| Anolis Lizard      | ARRT-AGPGKN | -F-L-IKYQ-LAET | -SCPLKGSVS | WQNCDFLPPS | EGDSGECTAE  | IHTDDSQVFS  |
| Xenopus leavis     | ARI-KTEN-GG | -T-HNFVSYDIREG | -SCGVKSGKV | WQNCDFKQSD | E-KVGKCSAH  | IVVNKELKTS  |
| Xenopus tropicalis | AKI-KIENDSG | -T-HNFVSYDIREG | -SCGVKSGKV | WQNCDFKQSD | E-KVGKCSAH  | VLVNKELKSS  |
| Nanorana parkeri   | TDA-QQRNDEN | GQIHVFLDYEIREG | -SCTVKSMHS | WQDCQFQAHT | P-EQGKCSAH  | LLINTEKKIR  |
| Latimeria          | AKTQ-LE-KE- | ---THYFVTYEIRE | STCSVHDNKI | WQCNVYVSP  | SATTGT CIAE | VYIDETVKTS  |
| Zebrafish          | ----EATKAQN | ESGDVLLVRFSSRE | TDCPAGGEKT | WHECDYLQQA | DKALRIC HAK | VQFTEAGEEL  |
| Pufferfish         | ----SASKTGS | GADAVYSLQFTSRR | SDCPAGGIKP | WTDCDYLPRR | -KSPVPCSAI  | VHV TATEVNT |
| Elephant Shark     | -----FGTVOR | KRGSRYFIKFDIOE | SNCLVESEKT | WTBCHDRPPT | VANIGHCESS  | VYIHRAGRI   |

**Supplemental Figure S1. A) Amino acid sequence alignment of vertebrate high molecular weight kininogens (continued).**

|                    |              |              |                |             |             |                 |  |
|--------------------|--------------|--------------|----------------|-------------|-------------|-----------------|--|
|                    | 103          | 114          |                |             |             |                 |  |
| Human              | -VATQTCQITP  | AEGPVVTAQY   | DCLG---CVHPIS  | TQSPDLEPIL  | RHGIQYFNNN  | TQHSSLFMLN      |  |
| Dog                | -VATQTCQITP  | AEGPVVTAQY   | DCLG---CVHPIS  | IASPELEPVL  | RHAIEHFNNN  | TDRSHLFALR      |  |
| Siberian Tiger     | -VATQTCQITP  | AEGPVVTSQY   | DCLG---CVHPIS  | TASLDLEPVL  | RHAIQHFNNH  | TGRSHLFALR      |  |
| Grizzly Bear       | -VATQTCQITP  | AEGPVVTAQY   | DCLG---CVHPIS  | TASPDLEPVL  | RHAIEHFNNN  | TAHSHLFAVR      |  |
| Hippopotamus       | -VATQTCQITP  | AEGPVVTEQY   | NCLG---CMHPIS  | TTHPDLEPVL  | RHAIQHFNNN  | TDHSHLFELR      |  |
| BN Dolphin         | -VATQTCQITP  | AEGPLVTAQY   | DCLG---CLHPIS  | TESPDLEPVL  | RHAIQHFNNN  | TDHSHLFDLK      |  |
| Opossum            | -ITEQHCKIIP  | VNDEVIADV    | PCLG---CYRPIS  | ANDEDLQAVL  | NNAVEQFNYQ  | SQSDHLYTLK      |  |
| Koala              | -VIEQNCHIIIP | AHDVVVAVHS   | PCLG---CFNPIS  | TNHSDELEIL  | KHGLQSFNEK  | SKHEYLFALK      |  |
| Wombat             | -VIEQNCHIIIP | AHDVVVAVHR   | PCLG---CFNLIS  | TNHSDELEIL  | KHALQSFNEK  | SKHEYLFDLK      |  |
| Platypus           | -VSLQTCQITP  | AEGPVITAHY   | ECSG---CIHPIS  | PTSTDLPIL   | KHGLQHFNNR  | TNHPFLFRVN      |  |
| Kiwi               | -NVSQDCKTVP  | ATATIIPAEA   | LCLG---CYYPIS  | SDSLQVSEIL  | KQAIQKFNRH  | SDEAALFKLV      |  |
| Pigeon             | -NVSQDCKISP  | ATPKVTRTEA   | TCLG---CFHPIS  | SDSSEVSEIL  | KQAIQKFNRH  | SAESALFKLV      |  |
| W-T Tropicbird     | -NVSQDCKIFP  | AMPKITVTEA   | TCLG---CFHPIS  | SDSSGVSEIL  | KQAIQKFNRH  | SAEPALFKLV      |  |
| Alligator          | -NVSQECCKIIP | AAGKVTLSPA   | PCLG---CYHPIP  | GNSLDLLPIL  | RYAIRNFNKE  | SQKSFLYEVG      |  |
| Green Sea Turtle   | -NVTQECCKIIP | VEGKVLISHV   | QCLG---CYHPIP  | GDSLQLLPIL  | RYAIRIFNNQ  | SEQSSLFEVG      |  |
| E Brown Snake      | -SISQNCCKISQ | GQQNIEQSHV   | EFVGLSQCVGCWH  | RIKTLSPRVL  | HIVRHTVRQF  | NNQSQHSSLF      |  |
| Anolis Lizard      | -SVFQTCRITT  | APGKVTRSHA   | RCLG---CWHITIS | SKSEELVPIL  | RRAIYLFNNE  | SDQQPLFDAV      |  |
| Xenopus leavis     | EVIIQNCSTFQ  | V-EPTVSAIKQ  | DCLG---CPINLD  | TRNKDLLPLI  | KSAIEKMKNL  | ANYPFYFDLE      |  |
| Xenopus tropicalis | EVIFQNCSTFK  | V-EPTVTAVEQ  | GCLG---CPIKLD  | TTNEELLPLI  | KVAMEKMKNV  | ANHPFYFNLE      |  |
| Nanorana parkeri   | TVVSQTCQSVSK | VPLEPYVTAVHH | QCLG---CPYPID  | TNNEEVLRV   | HIAIEKMNRQ  | GSHLYYFDLD      |  |
| Latimeria          | -VVSQKCDLVP  | -PKDPIVPSVA  | QCLG---CPREIP  | TNSSKVKVVL  | DAALKKYNKE  | SNHSFHF---      |  |
| Zebrafish          | --LLHDCLEPA  | -----IIASVA  | PCIVTEECCHPLLE | KTEVLKCNSS  | VDVAPWRHEV  | PEVHVVCAGVSKTNS |  |
| Pufferfish         | --RHVECCQIDG | ----HFTPEKA  | PCLG---CEMEID  | ENSEDLKSP   | SVSITKYNM   | SNLHLFTLN       |  |
| Elephant Shark     | EVTMYNCTIIP  | VNDPWIVPKIA  | PCLG---CAISLP  | HNSSRAKETL  | DYSIKKFNSD  | SNYPNIFGSE      |  |
|                    | 163          |              |                |             |             |                 |  |
| Human              | EVKRAQRQVV   | AGLNFRITYS   | IVQTNCSKENF    | LFLTPD-CKSL | -WNGDTGECT  | DNAYIDIQL       |  |
| Dog                | EVKKAHRQVV   | TGWNYEITYS   | IEQTNCSKENY    | LFLTPD-CKSL | -LNGDIGECT  | DHAHMDLQL       |  |
| Siberian Tiger     | EVKRAHRQVV   | AGWNYEITYS   | IVQTNCSKEHF    | LFLTPD-CKSL | -LNGDIGECT  | DHAHVDLQL       |  |
| Grizzly Bear       | EVKRAHRQVV   | AGWNYEITYS   | IAQTNCSKENF    | LSLTPD-CKSL | -LNGDIGECT  | DHAHMDLQL       |  |
| Hippopotamus       | XXXXAQRQVV   | AGWNYEITYS   | IVQTNCSKENF    | LFLNPD-CKSL | -PSGDVGECT  | DKAYVDIQX       |  |
| BN Dolphin         | EVKKAQRQVV   | AGWNYEITYS   | IVQTNCSKENF    | LFLTPD-CKSL | -SNGNIGECT  | DKAYVDIQL       |  |
| Opossum            | DVLKALRQVV   | RGWNYDLEFT   | VVETNCKVSEV    | KNVTSE-CKPL | -PQGKSMACR  | ELSHVSPDM       |  |
| Koala              | EVMNASRQVV   | NGWNYKIQYS   | IVQTDCKSKED    | GQLSDK-CKPT | -PQGEISVCS  | DFTYVDPQM       |  |
| Wombat             | EVMNASRQVV   | NGWNYKVQYS   | IMQTDCKSKED    | GQLSAK-CKPV | -PQGEISVCS  | DFTHVDPQM       |  |
| Platypus           | EVKKAQRQVV   | SGWNFDVHYT   | IIQTNCSKQDF    | EELLPD-CKPM | -PGGDTGDCS  | DKAFVDPHM       |  |
| Kiwi               | EIKEAKRQVV   | AGWNYIIKYE   | IKETNCSKDQF    | QDLSPE-CKTT | -STGRVGNCE  | AKAYANLND       |  |
| Pigeon             | EIKEATRQVV   | AGWNYIIKYE   | VEETNCSKDQF    | QDLTPE-CKTT | -SRGHIGKCD  | AKAYVNPQG       |  |
| W-T Tropicbird     | EIKEAKRQVV   | AGWNYIIKYE   | IEETNCSKDQF    | QDLTPE-CKTT | -SRGRVGKCD  | TKAYENLHA       |  |
| Alligator          | EIIKATRQVV   | AGWNYAVEYM   | VKETNCSKKEF    | QDLSPK-CKPI | -FGGHVGNCV  | AKAFVDLSN       |  |
| Green Sea Turtle   | EIIKATRQVV   | AGWNYAVEYE   | VKETNCTKNNF    | QDLSPE-CKPI | -VGGHVGRCE  | AKAYVDLTN       |  |
| E Brown Snake      | GFPVINEAES   | QVNVGVNYRF   | KYSINETNCSK    | KEFLDLSPECR | PLSGGLKVFCE | AKAYVDNRG       |  |
| Anolis Lizard      | GVVHAARQVV   | AGWKYKFEYW   | IQETNCSKADF    | ADMAPE-CKIL | -PKGHVGSCH  | VESYVDFRN       |  |
| Xenopus leavis     | NIIETALQVV   | AGWNYRLIYT   | VRQTNCSKSIH    | SNVPLEECDLD | -ANGQNGTCT  | TQVFKNTRG       |  |
| Xenopus tropicalis | TITEATRQVV   | FGWNYKLFYT   | IRQTNCSKSIH    | SNVPLEECNFD | -ANGQNGTCT  | TQLFINTQG       |  |
| Nanorana parkeri   | QIVNATRQVV   | GGWDYIINC    | VRKTNCSKMDF    | KTGDSNECKLD | -KEGETGECE  | LQVSETPDG       |  |
| Latimeria          | EIKRATSQVV   | AGFKYRVEFR   | ITETNCSKKDF    | -EELTEDC-SP | -ISATTGTCTI | AEVYIDETV       |  |
| Zebrafish K        | RFKRPPGWSP   | LSKESISPPK   | HVPLNCPKTPW    | -KEFKPIIAPP | --NATEPSEP  | SADTALS         |  |
| Pufferfish         | SVGYATRQVV   | AGFRFKIRFD   | MKKTTCAKSQH    | -SDLSDLCPVD | DQNMEFANCN  | STVDVAPWR       |  |
| Elephant Shark     | VIFKVTSQVV   | AGYLYTLKFS   | LRETECTKSSN    | --DVWQDCILK | PDNATTLYCN  | STVLFSIRA       |  |

**Supplemental Figure S1. A) Amino acid sequence alignment of vertebrate high molecular weight kininogens (continued).**

|                    | 222         | 235         |             |     |            |        |           |            |
|--------------------|-------------|-------------|-------------|-----|------------|--------|-----------|------------|
| Human              | R-IASFSQNC  | IYPGKDFVQP  | PTKICVGC    | PRD | IPTN       | SPELEE | TLTHTITKL | NAENNATFYF |
| Dog                | R-IASFSQKCE | LFPGEDFVQP  | PSRICLGCP   | PKK | IPVD       | SPELEV | PLTHSIAKL | NAENNGTFYF |
| Siberian Tiger     | R-IASLSQKCE | LYPGEDFIEP  | PPSICPGCP   | PKE | IPVN       | SPELEV | ALNHSTAKL | NAENNGTFYF |
| Grizzly Bear       | R-IASFSQKCD | LYPAEDFVQP  | -SKICSDG    | PKD | IPVN       | SPELEV | ALNHSIAKL | NAENNGTFYF |
| Hippopotamus       | R-IASFSQKCN | VYPEEDFVAP  | PTRICAGCP   | PIR | IPVD       | SPELEE | PLNHSIAKL | NAENNGTFYF |
| BN Dolphin         | R-IASFSQKCD | LYPGEDFVQP  | PTRICAGCP   | PIS | IPVN       | SPELEE | PLEHSIAKL | NVENNGTFYF |
| Opossum            | K-ISSHLQTCQ | --TEADS-QF  | SD          | MQY | ISGY       | SPELKE | SLRAALENF | NSENESDFYF |
| Koala              | K-ISIVSQACN | --PGSDSASS  | VT-----     | QK  | MSVY       | SPELKE | PLRHSLEKI | NSENKNNFYF |
| Wombat             | K-ISIVSQVCN | -----P      | RSDSGSSVT   | QK  | MSIY       | SPELNE | PLRYSLEKI | NSESKNNFYF |
| Platypus           | K-ITGFVQNC  | LFPGAEWIPP  | PDLMCAGCP   | PQN | LPVD       | SPELKE | PLKHSLDKV | NSADNYTFYF |
| Kiwi               | Q-IIDTASQCK | FPAEETVDPP  | -TLICAGCP   | PRP | IPKT       | SPELKE | LLEVSMEKY | NLETNDDFYF |
| Pigeon             | Q-IVDIASQCK | LPVEKTVNPD  | ---IRTGCTKT |     | IPTD       | SPELKE | LLKLSMEKY | NSESNDHHYF |
| W-T Tropicbird     | Q-IVDIASQCK | LPVEDTVVPA  | -TR--TNC    | PKT | IPKD       | SPELKE | LLKVSMEKY | NLESDDDFYF |
| Alligator          | T-LVDVTQCK  | FPVEETVPPP  | --QMCPC     | PKR | IPND       | SPELKE | VLKASMEKY | NSESDDDFYF |
| Green Sea Turtle   | T-IADVAQKCK | FPVAETVSPH  | -ISICAGCP   | PRP | IPTN       | STELEE | PLRATLEKY | NAESNDHFYF |
| E Brown Snake      | T-LIHSEVECR | PEAEDNMRIL  | -AQACPGCH   | SP  | LAPD       | SQELKR | PLEAVVKLF | NIKSSSDFYF |
| Anolis Lizard      | T-IVNVEQKCE | LEVDTKKN--  | ----CPGCP   | PRT | IPSD       | SQELKE | PLAAIVENY | NTKCSNGFLY |
| Xenopus leavis     | E-IIDINLSCF | SQ-----KG   | FCLSCPDA    | VDV | DDPE       | LLDLLR | QVMDEYSY  | NNNTNLNFV  |
| Xenopus tropicalis | E-IKDINLECF | SQ-----KG   | FCLSCPDA    | VDV | DDPE       | LLDLLR | QVMDEYSN  | NNNTNLNFV  |
| Nanorana parkeri   | Q-VNDIILKCT | SQAGVC----- | LNCPLN      | VDS | DDAE       | LQNLIS | QVIDEYSN  | INVTNLHKLN |
| Latimeria          | KTSEVVSQKCD | LVPPKDPIVP  | SVAQCLGCP   | PRE | IPTN       | SSKVKV | VLDAALKKY | NKESNHSFHF |
| Zebrafish          | DLIR        |             |             |     |            |        |           |            |
| Pufferfish         | HELPQVQMECE | EGMLIMPLIK  | RRPPGWTP    | LRK | FEKPGSAAKE |        | ESSEEDTAA | AQPSASPVVD |
| Elephant Shark     | NEIDTF-VSCS | TDPIGFQMEG  | FRSQPTETIGI |     | LAQQRQRHRQ |        | HHFYQQQDS | HEQHLINKSE |

|                    |             |              |              |             |            |              |  |  |
|--------------------|-------------|--------------|--------------|-------------|------------|--------------|--|--|
|                    | 282         |              |              |             |            |              |  |  |
| Human              | KIDNVKKARV  | QVVAGKKYFI   | DFVARETTCSK  | ESNEELTESC  | ETKKLGQSL  | DCAEVYVVP    |  |  |
| Dog                | KIDSVQSATV  | QMVGAEKFFI   | QFVARETMCSC  | ESNEELAESC  | QINKYGEQL  | KCEAEVYVIP   |  |  |
| Siberian Tiger     | KIDHVKSATV  | QVVAGKKFSI   | EFTARETTCSK  | ESNEELTESC  | NTNKF GKIL | DCKAEVYVIP   |  |  |
| Grizzly Bear       | KIDS VKSATV | QMVAGKKFSI   | AFTARETTCSK  | ESNEELTESC  | QINKYGHTL  | ECKAEVFVIR   |  |  |
| Hippopotamus       | KIDMVQKATV  | QVVAGKKYSI   | AFTARETTCSK  | ESNEELTKSC  | EIHKHGRLL  | SCNADVYVVP   |  |  |
| BN Dolphin         | KIDTVEKATV  | QVVAGKKYSI   | VFTARETTCSK  | ESNEELTKSC  | EINKHSPI L | NCKADVYVVP   |  |  |
| Opossum            | KPSILLKAHL  | -VEPEGKH SI  | EIQVQETECSK  | EKG-QFSEDC  | EFKTDGRVL  | QCIVQVPMGQ   |  |  |
| Koala              | KMETIEKAES  | PAGPGPKYII   | EFLIKETEC SK | EKD-KYSEDC  | AFKESGDGL  | KCIANVSVED   |  |  |
| Wombat             | KMDTIQKAES  | LVGPEPKYII   | EFLIKETEC SK | EKD-KYSEDC  | TFKELGDGL  | KCVANIPMED   |  |  |
| Platypus           | KVETIRKATF  | QLVAGQKFSI   | EFLVRQTRCSK  | EDNEKMPEDC  | EVDSNGKVL  | VCNAMVYMVP   |  |  |
| Kiwi               | KAGDIEKATV  | QVVAGKSYRI   | TFTVKKTNC SK | KEFEKL NEDC | EATPNSVRL  | KCEAQIYVIP   |  |  |
| Pigeon             | KSGDIEAAAV  | QVVGSKIYHL   | EFAVRKTNC SK | KEFEKL NEDC | EATS DSAPL | PCEAQIHVIP   |  |  |
| W-T Tropicbird     | K-GEIEEATV  | QVVAGQNYHL   | IFAVRKTNC SK | KEFEKL NEDC | EATS DSAPL | PCEAHVHVIP   |  |  |
| Alligator          | KVESVFHSTV  | QVVAGKNYEI   | EFLIGKTNC SK | SEVEKL NEDC | KIVIPKISL  | QCTANIYVVP   |  |  |
| Green Sea Turtle   | KAENVLYATV  | QVVAGKNYNI   | RFKIRKTNC SK | TDVKKLNEDC  | VTTTDSKPL  | LCTAQVYVIP   |  |  |
| E Brown Snake      | KIVDITKISG  | QMLVGHVYRI   | DFKAQRTNC SK | AEVEKPDKNC  | HAVKG GELM | TCHALIYVKP   |  |  |
| Anolis Lizard      | RITKVTKATV  | QIVSGIMYRI   | EFQITETNC SN | AEVHEL NEDC | IAMENSESL  | QCYGS AWEKP  |  |  |
| Xenopus leavis     | SVDYASKKGV  | HEKTYDVTFN   | ---IKETNC SK | SDYAILGEEB  | QFIETKNAL  | NCDAKVNVT D  |  |  |
| Xenopus tropicalis | SVNQASKKGT  | HEKTYDV KFN  | ---IQETNC SK | SDYSILGEEB  | EFIETKEAL  | NCDAKVNI TD  |  |  |
| Nanorana parkeri   | QVIKATKHGF  | QE QIYEVLF S | ---MMPTVC SK | PDHTILGDEB  | NNLENASPL  | SCDTTIKVTD   |  |  |
| Latimeria          | GVVEIKRATS  | QVVAGFKYRV   | EFRITETNC SK | KDFEELTEDC  | AISEK-NPH  | N CNSATT VVP |  |  |
| Zebrafish          | VVPDDPLHCP  | SK           |              |             |            |              |  |  |
| Pufferfish         | DPLHCSPKVV  | PD           |              |             |            |              |  |  |
| Elephant Shark     | PAVITTSAPL  | ELPLSAIDOL   | ADLLGPEPPVN  | CPGKPKWKPL  | OSN        |              |  |  |

**Supplemental Figure S1. Amino acid sequence alignment of vertebrate high molecular weight kininogens (continued).**

|                    | 342         | 358           | 384         |                                            |
|--------------------|-------------|---------------|-------------|--------------------------------------------|
| Human              | -WEKKIYPTVN | --CQPLGMIS-LM | KRPPGFSPFRS | SRIGEIKEET TVSPPHSTSM --APAQDEERDS         |
| Dog                | -WEKKIYPTVN | --CQSLGKVI-LM | RPPGFSPFRS  | SFMEKTEKGT TVSSPHNSM --VPVQDEEWDS          |
| Siberian Tiger     | -WEKKIYPTVH | --CQSRGETT-LM | KRPPGFSPFRS | VQVEKTEKGT TVSPPHSTSM --ASVQDEEQDS         |
| Grizzly Bear       | -WEEKIYPTVN | --CQPLKKII-LM | KRPPGFSPFRS | VPLEKTEEGT TVSSPHISM --APVPDEERDS          |
| Hippopotamus       | -WEEKIYPTVN | --CQPLGQTS-LM | KRPPGFSPFRS | VQVEKTEKGT TVSPPHPSM --APEQDEERDS          |
| BN Dolphin         | -WEKKIYPTVN | --CQSLGQTT-LM | KRPAGFSPFRS | VPVEKTEKGT IVSPPHSTFL --APVQDEERDS         |
| Opossum            | DGEVKPVI--D | --CHEPPPELGLM | KRPSGFSPFRS | AL--RILEEK IIAAREPQN FNTTEQEEQTP           |
| Koala              | --EGTFNPTVR | --CEHPTM--LM  | KRPPGFSPFRA | AAVIPEMEGA EAPSEPQTS -DMTDQEEAQGP          |
| Wombat             | --EGTFNPTVH | --CEQPTM--LM  | KRPPGFSPFRA | AALIPETNGA EAPSEPQTS -DTTDQEEAQ-P          |
| Platypus           | -WKNEVFPTVT | --CQDLEMSSFL- | KRPPGFSPFRS | VQT-PAKEGS NVSPQPQPK -APDREEE-QA-          |
| Kiwi               | -WENKILPQVN | --CTEELLPVFLA | RPPGFTPFRT  | AQYFAQSQPD TTS----- -SNKNETES              |
| Pigeon             | -WENKILPQVN | --CSIERSAAVLL | RPPGFTPFRT  | --FVALGQPN ENSCSQNE KEMQRPGEETG            |
| W-T Tropicbird     | -WENKIFPQVN | --CSKERSMTVLL | RPPGFTPFRT  | FAMLSQPS-E IL-CSDKNE EERQTPGKEMR           |
| Alligator          | -WKQEIFFQVN | --CSEVTPIIQAR | RP-PGFTPFRT | L-MLHEIYPQ TSPLQTAE E GKDPDKGPREN LGPGLENE |
| Green Sea Turtle   | -WTKTIRPKVS | --CAEEENLLMR  | PPGFT--PFRS | LAVEAKTVQY T-PQIKNEK GPREGQGRGKSGK         |
| E Brown Snake      | -WEPVSVPEVT | --CTDDQPFQAHE | LEEPNILEDGF | NIFHDYEEQK WFLWYLLGRY TLSVILKLF            |
| Anolis Lizard      | -WQPKSEVEVT | FKCMEKAFNTALL | RPPGFTPFRT  | AAMATEEN-- TQVCGHRH- GHKNGHNKTKPKSSD LQE   |
| Xenopus leavis     | -TKIIVASSPI | --CNARARTMEFL | NQFLAKMGDNT | IFVVYSAMFT YKGLSPFRG VLPQGSPIRI            |
| Xenopus tropicalis | -TKITVASSPM | --CIHRVRST--- | -----PFFS   | ----- YKGLSPFRM VLPQANPSNK                 |
| Nanorana parkeri   | -KRINVHSGPV | --CVEQQA----- | -----       | -----LIMR LSGLSPLRM SKKPDQAETN             |
| Latimeria          | -WKNTTTTDVN | --CVL---EMALL | RLPAGMSPFRV | LQATPDSAK- -----                           |
| Zebrafish          |             |               |             |                                            |
| Pufferfish         |             |               |             |                                            |
| Elephant Shark     |             |               |             |                                            |
|                    | 402         |               |             |                                            |
| Human              | GKEQGHTRRH  | -DWGHEKQRKH   | NLGHGHKHE   | RDQGHGHQRG HGLGHGHEQQ HGLGHGHKFKL          |
| Dog                | GKEQGPTRGH  | -GRGHEKQIKH   | GHKYKHDQG   | YGHNRGHGLG HGHQKQHGLG HGGQRELD FDL         |
| Siberian Tiger     | GKEQGPTRGH  | -GWGHGKQIKH   | GFGHGHKHE   | HDQGHRHNRG RGLGHGHQKQ HGFAHGHQKQH GFGHGHQQ |
| Grizzly Bear       | GKEQGPTRGH  | -GWGHEKQIKH   | GFGHGHKPE   | HDQGRGYHGG RGLGHGYQKQ HGLGHGHQREH          |
| Hippopotamus       | GKEQGPNRGH  | -GWGHGNQIKH   | GLGHGHKXX   | XXXXXXXXXX XXXXXXXXXXXX XXXXXXXXXXXX       |
| BN Dolphin         | GKEQGPTRH   | -GWGHGKQIKH   | GLGHGHKHE   | HDQGHGHQKG HDLGHGHQRG HGHQGGHGLAH          |
| Opossum            | GK-AGYP--H  | -DHGHWQRGR    | HPVHGTKNH   | PGSGLGHKHG HNHSHGRRH HDLG-----             |
| Koala              | GKEQGLTRSF  | -GPGH--QKEH   | NSGHGHK--   | -----DHRG LGLGHKHEHA H-----                |
| Wombat             | GKEKGLIR--  | -----         | SFGHGHRKE   | HSSGHGHKDH PGLGLGHK---HGH-----             |
| Platypus           | GKRRGHPLGH  | -DSCRGRGPQ    | GRGRGCKRA   | RD-----                                    |
| Kiwi               | QTPSTETR--  | -----         | -----       | KDHGHGPEGE GEPGCKHRHK HGCKHGHGFKK          |
| Pigeon             | KDGGQEPE--  | -----         | -----       | GEGEPE HKHGHKHEHK HGHKHEHKHE HKHEKDHKPDK   |
| W-T Tropicbird     | KDGGQEPEGK  | GEPEKHRLMX    | GRKHRHGYI   | KDHESDKRHR HEIGCGHRTG YGHGHKKH SKN         |
| Alligator          | DGQGDGCDHR  | VGHGNGHGHGQ   | GHRFNHKPG   | HGRGRGRGHD IGRGHKKH QK KDKHKDSK            |
| Green Sea Turtle   | DIRHEPA-HK  | QGHRHDIGHGP   | EHDHRRGHE   | DEHGCRHDIG HEPEHEHRRG HGHKDEHRCRH          |
| E Brown Snake      | LSFPCSSEAQ  | RSFSH         |             |                                            |
| Anolis Lizard      | DADKHDESLP  | TASTSNPLKLA   | MEVFILLVL   | SVGLCQAGPV QDDVSCDDPE XVFEAVARAIT          |
| Xenopus leavis     |             |               |             |                                            |
| Xenopus tropicalis |             |               |             |                                            |
| Nanorana parkeri   |             |               |             |                                            |
| Latimeria          | -KEEKE----  | ---TELRRT-    | -----DD     | KPHGHERGRG RGRGQEHGR GPGHEH----            |
| Zebrafish          |             |               |             |                                            |
| Pufferfish         |             |               |             |                                            |
| Elephant Shark     |             |               |             |                                            |

**Supplemental Figure S1. Amino acid sequence alignment of vertebrate high molecular weight kininogens (continued).**

|                    | 462        |             | 503              |                                      |
|--------------------|------------|-------------|------------------|--------------------------------------|
| Human              | DDdleHQGGH | VLDHGHHKHH  | GHGHGKHKNKG      | KK-- NGKHNGWK TEHLASSE DStT-PSA---   |
| Dog                | EHQRRHGLGH | GHQRGHGLAH  | GHKYEHHGHGHE     | KY-- KNKRKDNG KNGRKTEN LAGS-PED---   |
| Siberian Tiger     | QHQRHGLGH  | GHQRGRGLAH  | GHTHEHHGHGHE     | KY-- KNKRKDNE KDNGWRIEH LASS-SED---  |
| Grizzly Bear       | -----      | -----GLAH   | GHIREHGGQHG      | KY-- KNKRKDNG KPNDWKTEH LASS-PEE---  |
| Hippopotamus       | XXXXXXXXXX | XXXXXXXXXX  | XXXXXXXXXXXXXX   | XX--XXXXXXXX XXXXXXXXXXXX            |
| BN Dolphin         | -----      | --GHKHGHGH  | GKHKNRGKNNG      | KH--DGWRTEYL ANFY----E DSTI-SSS---   |
| Opossum            | -----      | ---QGNKHHK  | GQGHWKHEKKP      | KK---NRK--SWM DEYPYSPTE EN-F-PSS---  |
| Koala              | -----SQ    | GHGHRHKKHH  | GEGHRKHEKKG      | KK---SP--GSWT DRYLDSPAK ENS--PS-KT   |
| Wombat             | -----AHSQ  | KHGHRHKPKH  | GEGHQKHEKKD      | KK---S--HGSWT NGYLDSPIK ENS--PSSKT   |
| Platypus           | -----      | ---HERSPEC  | RGQKHRNKDR       | PR---GKPNGGK- -KNCPEDNS NPSR-PEQ     |
| Kiwi               | DHASDKRHRQ | G--IDCGHRT  | GHGCGHQKHSK      | HGKHHPNPKSSE ESDERVFNH KETL-PSS      |
| Pigeon             | RHRHEIGCGH | KTGHKCGHKK  | HSKNG--KHPN      | PESSEESDERVFN QDETSPSST DETASPEAAV   |
| W-T Tropicbird     | GKRKYPNPKP | SDESDEGRFN  | QNKTIPTASAE      | TDKRHRHEIGCGH RTGYGHGKH KHSKNGKRKYPN |
| Alligator          |            |             |                  |                                      |
| Green Sea Turtle   | DIGCGSEHE  | DKHGRGHGHGK | HRIKDCKKHS       | TEESSEESHDKVT NQKETLLAV VAEIQSHK     |
| E Brown Snake      | AYVDNANTL  | VHTQQDCQVQV | EEKVGPPVHL       | CPGCPVEI                             |
| Anolis Lizard      |            |             |                  |                                      |
| Xenopus leavis     | RR-DTERA-- | -----KG--   | PAHGNKGEQKH      | VKKHKKK---KD KRKKKNGHK NEDSSEES      |
| Xenopus tropicalis | NRIDTERA   |             | KRHA HGHGHKEEQKH | GRKHKKERKDKKD KKNKKNGHK NGDSSEES     |
| Nanorana parkeri   |            | LQQH        | TKGKNKGQHK       | RKQEQGKSDKKR KHKHDEDE ---SSEEV       |
| Latimeria          | -----      | ---GHGHKEKK | IHGHKQHGDDS      | SE--EHSHE ETTVATTIS ESLPDNADKP-      |
| Zebrafish          |            |             |                  |                                      |
| Pufferfish         |            |             |                  |                                      |
| Elephant Shark     |            |             |                  |                                      |
|                    |            | 519         |                  |                                      |
| Human              | -----      | -QTQEKTEGP  | TPI--P-----      | --SLAKP-GVTVTFSDQSDLI--ATMMP         |
| Dog                | ----STTSSA | -QTQEKTEGP  | TTL--P-----      | --SLAQ-P-GIAVTMPDFQSDLI--AAVMPN      |
| Siberian Tiger     | ----STTSSA | -QTQEKTEGP  | TPL--P-----      | --PLAQ-P-GIAVTLPDFQSDLI--AAVMSN      |
| Grizzly Bear       | ----STTSSA | -QTQEKTEGP  | TPL-L-----       | --SLAQ-P-GIAVTVPDFQSDLI--AAVN--      |
| Hippopotamus       |            |             |                  | --SLAQ-P-GVTVTSPDFQSDLI--AT          |
| BN Dolphin         | -----      | -QVQKKEGP   | TPF--P-----      | --SLAQ-P-SVANTFPNLQSDLI--ATVMPN      |
| Opossum            | -----      | -PMQEETQGP  | PPP--Q-----      | --SPSQQ-GVDVTPSYFQDFDLDNPNPTNIP      |
| Koala              | -----      | ---QEETQGP  | PPLLSSALQEV      | IT-PSDF-QDLDLNLNPTNPPSEPKTDEKT       |
| Wombat             | -----      | ---QEETQGP  | PPLLSSSLQEV      | IT-PSDF-QDLDLNLNPTNPPSEPPTTKEKE      |
| Platypus           | -----      | IDPEEPGTPP  | SILRPTHQPRP      | EGAVTLSYFRDSDLLSPDTPLAALP-----       |
| Kiwi               | -----      | --NAEMVSE-  | -----LVTPGA      | VR-----                              |
| Pigeon             | KKTSSPAECG | HKKHSHKNGKH | PNPESSEESDE      | RVFNQDETSPSSDTETAS--PEAAV-----       |
| W-T Tropicbird     | GKRKYPNPKP | SDESDEGRFN  | QNKTIPTASAE      | TASELVNPGVARKKTSTSAEPLILPDISLNLPLD   |
| Alligator          | DKSSEESSEK | VLCERESQLP  | SVDRTSENSQF      | PTTPSLFQSDALTPGVTVG                  |
| Green Sea Turtle   |            |             |                  | PDLVELD                              |
| E Brown Snake      | QQSALYEVRE | MKTATRQVVN  | GWNYNLEYSIK      | ETNCSKNEFLDLTPECRHLPPEGKEGFCVT       |
| Anolis Lizard      |            |             |                  |                                      |
| Xenopus leavis     | -QEYITLPTV | HATQRMQHTT  | TQTVQLITSAQ      | KQESLSKTPGEQIS                       |
| Xenopus tropicalis | -QEHTILLTQ | HTTAQTVELI  | TST--LTPHSI      | -----S-TPGQTP                        |
| Nanorana parkeri   | -DERG      |             |                  |                                      |
| Latimeria          | IPGSGLLPSS | VLIKPPSSGP  | GPVVLPSHPEQ      | IPAPDKPVTS TVEFPSPFD VALVSASL--      |
| Zebrafish          |            |             |                  |                                      |
| Pufferfish         |            |             |                  |                                      |
| Elephant Shark     |            |             |                  |                                      |

**Supplemental Figure S1. Amino acid sequence alignment of vertebrate high molecular weight kininogens (continued).**

558

|                    |                |     |            |              |                       |                   |              |
|--------------------|----------------|-----|------------|--------------|-----------------------|-------------------|--------------|
| Human              | ISPAPIQ-----   | SDD | DWIPDIQIDP | NGLSFNPISDF  | --PD <b>TTSPK</b> CPG | RPWK <b>SVSEI</b> | NPTTQMKE--   |
| Dog                | IPPTATE-----   | SDD | DWIPDIQIKP | NSLSFNLIISDF | --PEQ <b>TSPK</b> CPG | RPWKPVHGM         | NPTVEVKMN--  |
| Siberian Tiger     | TPPTPTE-----   | IDD | DWIPDIQIEK | NSLSFNLIIPDF | --PEK <b>TSPK</b> CPG | RPWKPVNGM         | NPTVEIKEF--  |
| Grizzly Bear       | NPSAPKE-----   | SDD | DWIPDIQIEP | NSLSFNLIIPDF | --PEK <b>TSPK</b> CPG | RPWKPVNGM         | NPAAVEVKEF-- |
| Hippopotamus       | LPPPTTE-----   | SDD | DLIPDIQIEP | NSLPFELISDF  | --PE <b>TTSPK</b> CPG | RPWKPINGV         | NPTVEMKE---  |
| BN Dolphin         | TLPPPTTE-----  | SDD | DLIPDIQIEP | NSLAFKLIPDF  | --PE <b>TTSPK</b> CPG | RPWKPVNGV         | NPTVEMKEFHD  |
| Opossum            | VEPTAEQKTGGEEA | EEE | VLFPDIPIVP | KSPLFTLMPDF  | PEPEPIVP <b>K</b> CPG | SPWQPITVM         | NPVTEESQNE   |
| Koala              | -----KETAGEEEY | TDD | DWIPDIPIQP | KSSLFTLVPDF  | --PEPPAP <b>K</b> CPG | RPWKPIDVM         | DPVKEESQYMD  |
| Wombat             | -----KEKAGEEED | TDD | DWIPDIPVQP | KSPLFTLVPDF  | --PEPSAP <b>K</b> CPG | RPWKPIDAM         | GPVKEESPYVD  |
| Platypus           | -----          | PSD | GDLFPEIQSE | PKDFSLGLLDF  | --PEPPPP <b>K</b> CPG | RPWKPIQGM         | DPATEEKQYDD  |
| Kiwi               | -----          | QET | SIPAETVTLP | DIFLVNGLPDR  | --SESPLP <b>R</b> CPG | KPWKPIMDL         | PVPPSFPPRELE |
| Pigeon             | -----          | KKT | SSPAEPLILP | DTSFSNGSPDH  | --PESPLP <b>R</b> CPG | KPWKQIMDL         | PAPDSFPREFE  |
| W-T Tropicbird     | ---ASELVNPGVAR | KKT | STSAEPLILP | DISLFNGLPDR  | --PESSLP <b>R</b> CPG | KPWKQLMDL         | PVPPSLPREFK  |
| Alligator          | ---PRDDSSTPDIP | EET | VSPGTAEIAP | DISLFDELPLD  | --PEPPV <b>S</b> KCPG | KPWKSIMQF         | TNPSENTILFT  |
| Green Sea Turtle   | VLPSTLTDGVTEIP | DLP | AEPDSPGIIP | DIPLFGLPLDV  | --PEPSVP <b>K</b> CPG | KPWKPIADL         | STTTNKPKVLT  |
| E Brown Snake      |                |     |            |              |                       |                   |              |
| Anolis Lizard      | ---QEDITARSPE  | ESV | GFPSPDSIVP | SLSLFERLPDL  | --PEPPAP <b>K</b> CPG | NPWKPIILP         | PTSLPDPGDFA  |
| Xenopus leavis     | KTTEKPTLGLFPHI | PSV | QEDQDNFFNF | HNNAEPDLGPG  | --DDSN <b>F</b> KCPG  | KPWEVPVKLP        | STEPTYDLFDL  |
| Xenopus tropicalis | ETTEEPTLGLFPQI | PSV | PEDQDNFFNF | HDNVEPDLGPG  | --EDSN <b>L</b> KCPG  | NPWEVPVKLP        | ITEPVYNPFDL  |
| Nanorana parkeri   | INVNMKEDSHQVLD | LPS | AQPTVPSKEA | VPKDIEEKSNI  | --ELPV <b>V</b> KCPG  | KLWQPRSLT         | TTVKTFTHDDL  |
| Latimeria          | -----          | PSF | PDVALVSASL | PDLHKETFPDL  | --PEGPEI <b>K</b> CPG | QPWKPI SPL        | HGVTSSEFSHT  |
| Zebrafish          |                |     |            |              |                       |                   |              |
| Pufferfish         |                |     |            |              |                       |                   |              |
| Elephant Shark     |                |     |            |              |                       |                   |              |

|                    |                                |                      |
|--------------------|--------------------------------|----------------------|
|                    | 617                            | 626                  |
| Human              | YYFDLTDGLS-----                | -----                |
| Dog                | PTVEVKEFHDFDLSDALY             |                      |
| Siberian Tiger     | EIKEFHDFDLSDALY                |                      |
| Grizzly Bear       | PDFDLTDALY                     |                      |
| Hippopotamus       |                                |                      |
| BN Dolphin         | FSLSDALY                       |                      |
| Opossum            | FELSDALSFGKK                   |                      |
| Koala              | FDSLDALEFGKK                   |                      |
| Wombat             | FDSLDALEFGKK                   |                      |
| Platypus           | FDLFDAVR                       |                      |
| Kiwi               | DLLPSAVENINPTTENSNTQNEETS      | FELSDALQ             |
| Pigeon             | NEDLLVFSLKNDPATESSTSP--QTKDL   | DLSDALL              |
| W-T Tropicbird     | NEDLLTSVKENVNPD TENSTPP--QNKDF | DLLDALL              |
| Alligator          | NEDLLPNPLENLPASEKPSPI          | NTDVGDFDLVDALPL      |
| Green Sea Turtle   | NEDLLPHLSED TNPETEKYTLPPQDL    | DDFNLMDSLL           |
| E Brown Snake      | ATDSPELQEPLQNIIESFNANNSGDFH    | FRIVEIKDATKQV        |
| Anolis Lizard      | LEDLLPSEGDVVEPKEISAVAIQ        | PVAADFDLADALY        |
| Xenopus leavis     | ASAIGDATPTVAENIENKVP           | GSTSQG--FNDEDLLLSFI  |
| Xenopus tropicalis | AFAIEDTTTTTTANENIKNKEPG        | SQGQPFNDEDLLLSLI     |
| Nanorana parkeri   | AFAAADFKPLPEKEEEEP             | SKPYTPKQI-PFFDDEDLLL |
| Latimeria          | SSAYEEKSMV                     | GGATDFKDTD LLGF      |
| Zebrafish          |                                |                      |
| Pufferfish         | PWKVFNPSPVAPT                  | DAPNMTADAPVLS        |
| Elephant Shark     | RHITPTDPVSETVPPPLNTAEEGEQ      | PKSDGFFDFDLAGL       |

**B) Cladogram depicting ancestral relationships of extant vertebrates together with **LK** and **HK** emergence.**

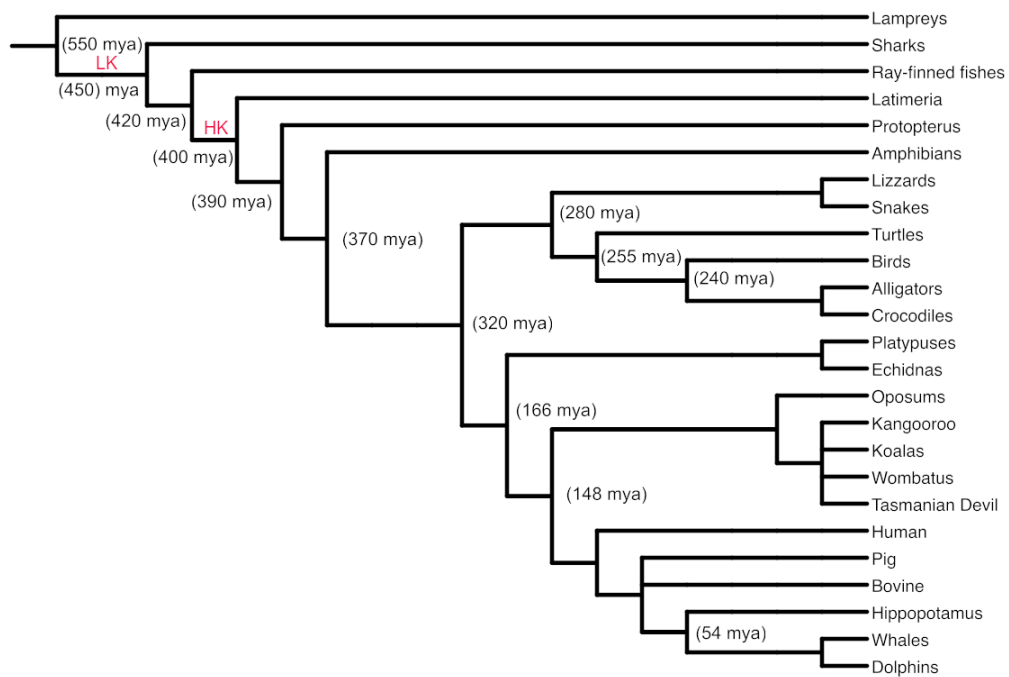



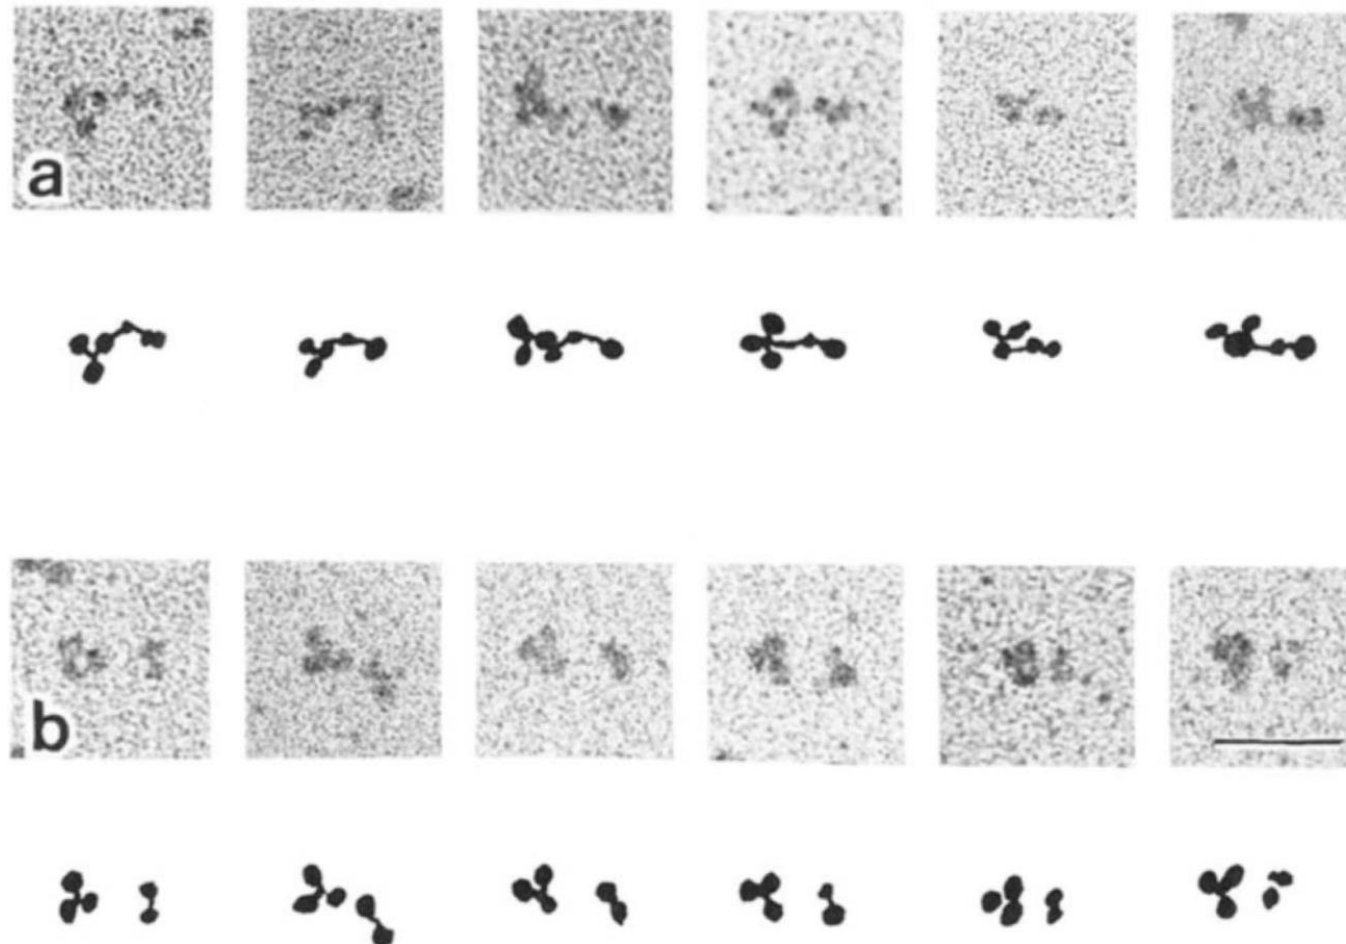

**Supplementary Figure S2.** Electron microscopy of rotary-shadowed complexes of monoclonal antibody 2B5 with high molecular weight kininogen according to Weisel *et al.* 1994 figure 3 (a) and with cleaved high molecular weight kininogen ( b ). (Weisel, J.W.; Nagaswami, C.; Woodhead, J.L.; dela Cadena, R.A.; Page, J.D.; Colman, R.W. The Shape of High Molecular Weight Kininogen. Organization into Structural Domains, Changes with Activation, and Interactions with Prekallikrein, as Determined by Electron Microscopy. *Journal of Biological Chemistry* 1994, 269, doi:10.1016/s0021-9258(17)36995-8.) The reproduction is presented according to JBC CC-BY license <https://www.asbmb.org/journals-news/copyright-and-reproduction>.

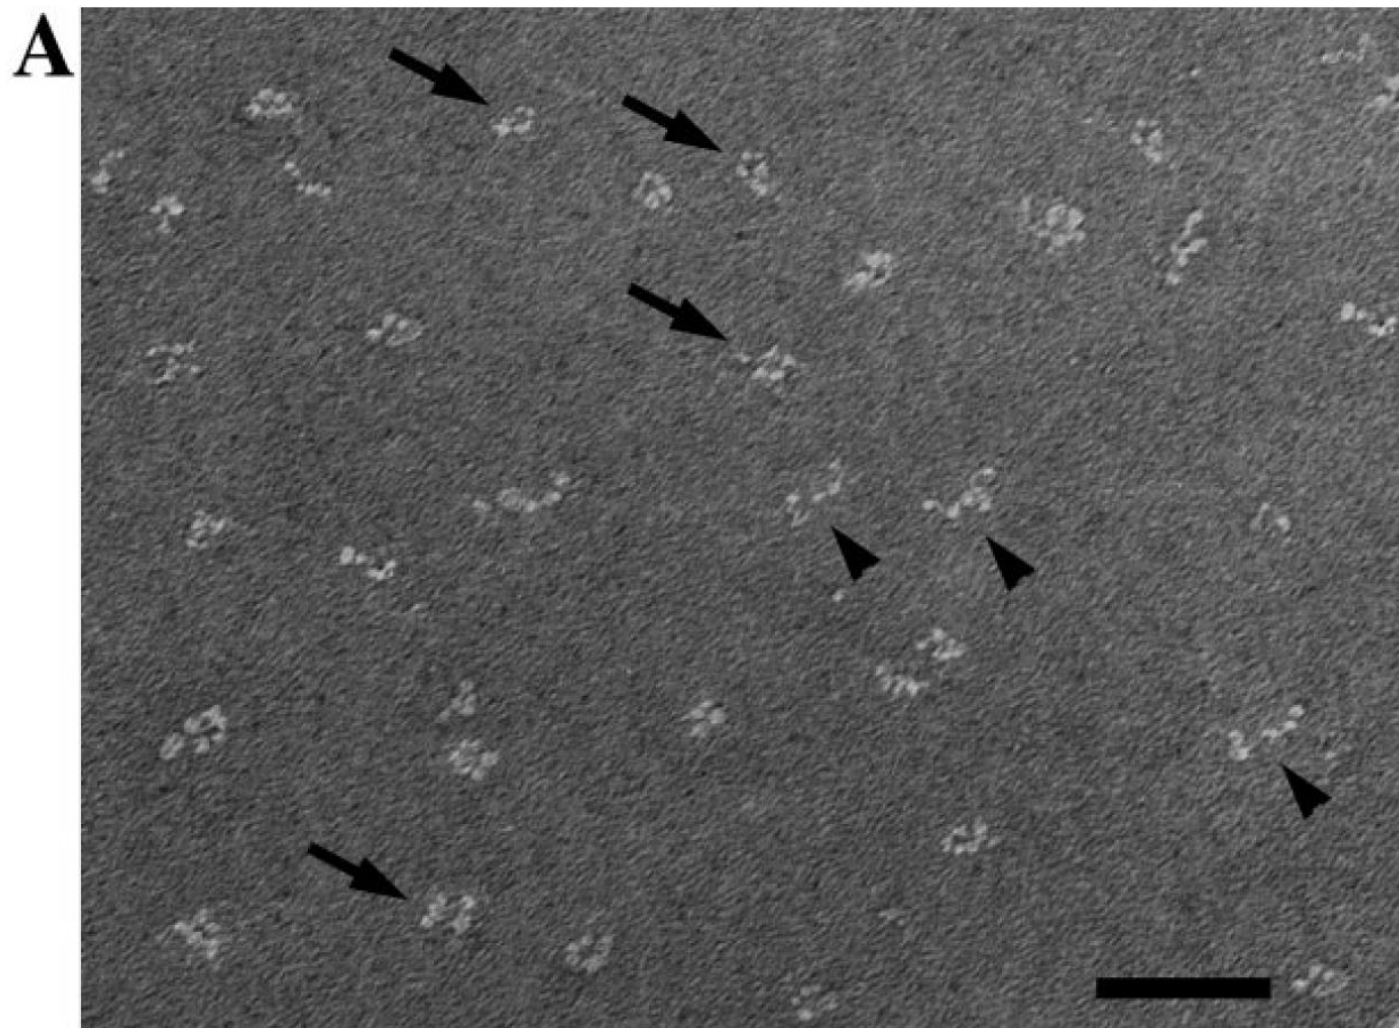

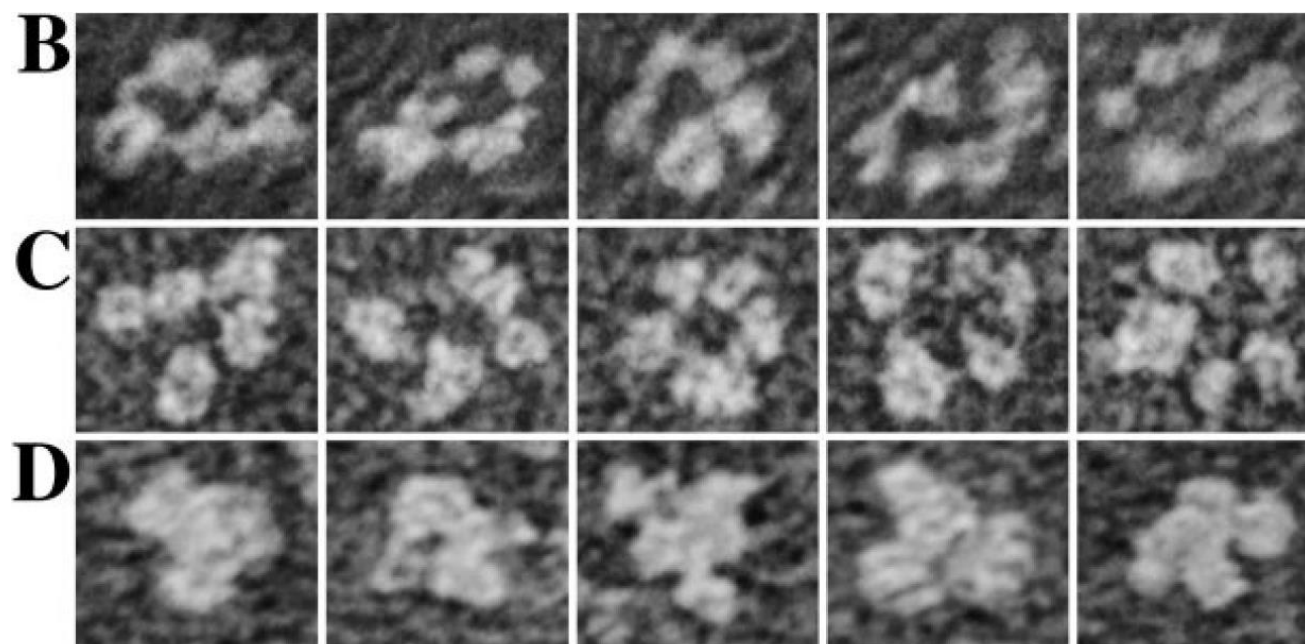

**Supplementary Figure S3.** Negative staining transmission electron microscopy according to Herwald *et al.* 2001 figure 9 A-D. (Herwald, H.; Mörgelin, M.; Svensson, H.G.; Sjöbring, U. Zinc-Dependent Conformational Changes in Domain D5 of High Molecular Mass Kininogen Modulate Contact Activation. *European Journal of Biochemistry* 2001, 268, doi:10.1046/j.1432-1033.2001.01888.x.). The reproduction is presented according to FEBS letters Creative Commons License.

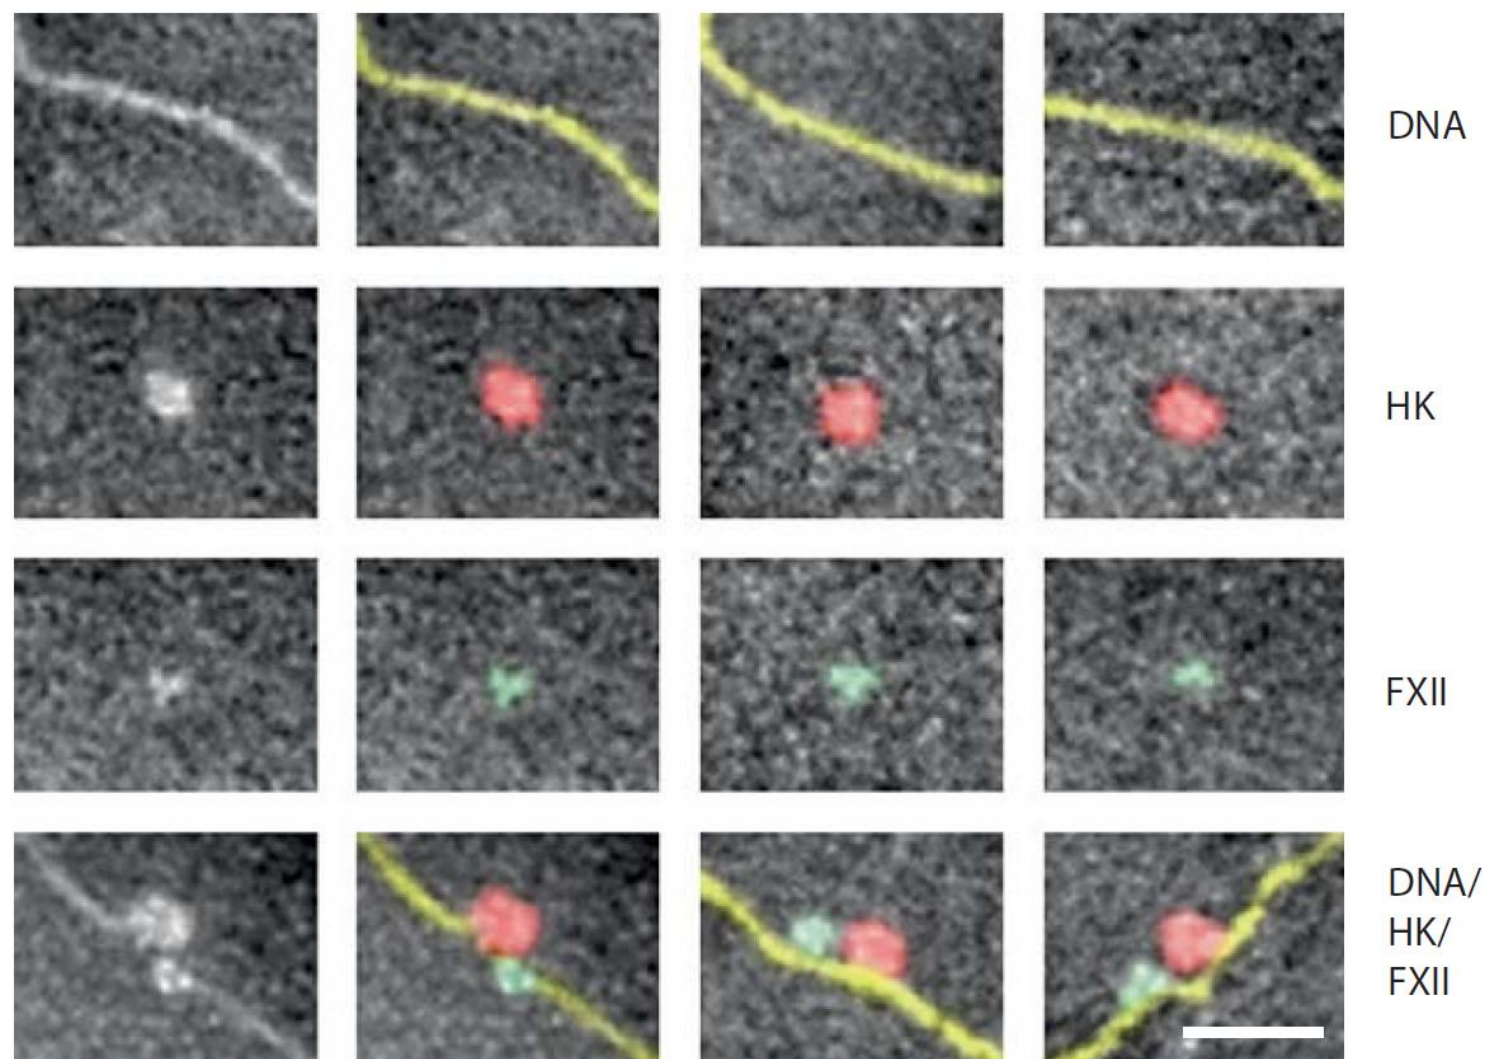

**Supplementary Figure S4.** Negative staining transmission electron microscopy of DNA and HK figure 1a according to Oehmcke, Mörgelin and Herwald 2009 (Oehmcke, S.; Mörgelin, M.; Herwald, H. Activation of the Human Contact System on Neutrophil Extracellular Traps. *Journal of Innate Immunity* 2009, 1, doi:10.1159/000203700.). The reproduction is presented according to reuse permission of the figure as MDPI and Karger, are signatories of the STM permission guidelines.
